# Supplementary material for: Effective AAV-mediated gene therapy in a mouse model of ethylmalonic encephalopathy
Source: PubMed Central journal article supplement (PMC3491831; doi:10.1002/emmm.201201433), 2012-08-20
Supplement: emmm0004-1008-SD2.pdf [file emmm0004-1008-SD2.pdf]

## Supplemental Material Online

Contents:

Supplemental Figure 1: Explanatory schemes. (A) proposed mitochondrial pathway of H<sub>2</sub>S disposal; (B) AAV2/8-TBG-*h.Ethe1*<sup>HA</sup> construct.

Supplemental Figure 2: Characterization of *Ethe1*<sup>-/-</sup> mice treated with 4x10<sup>12</sup> vg/Kg AAV2/8-TBG-*h.Ethe1*<sup>HA</sup>.

Supplemental Figure 3: Kaplan-Meier survival probability curves.

Supplemental Figure 4: Thiosulfate concentration in skeletal muscle.

Supplemental Table I: COX/CS activities in skeletal muscle and brain.

**Supplemental Figure 1**

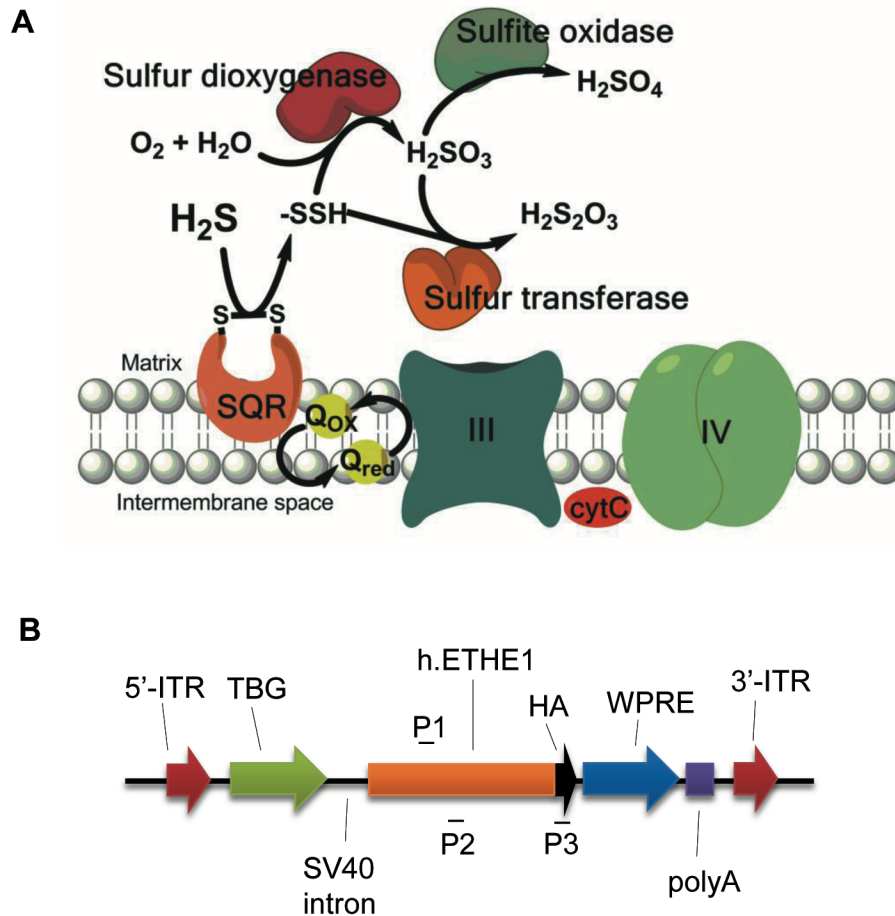

**Supplemental Figure 1. Explanatory schemes.** (A) Proposed mitochondrial pathway of H<sub>2</sub>S disposal according to Hildebrandt and Grieshaber, 2008. SQR: sulfide:quinone oxidoreductase; Qox: oxidized coenzyme Q; Qred: reduced coenzyme Q; III: complex III; IV: complex IV; cytC: cytochrome C; the Sulfur dioxygenase is encoded by *Ethel*. (B) AAV2/8-TBG-*h.Ethel*<sup>HA</sup> construct. ITR: inverted terminal repeat; TBG: thyroxine-binding globulin promoter; WPRE: Woodchuck Hepatitis Virus (WHP) Posttranscriptional Regulatory Element; P1-P3: primers used for PCR amplification.

## Supplemental Figure 2

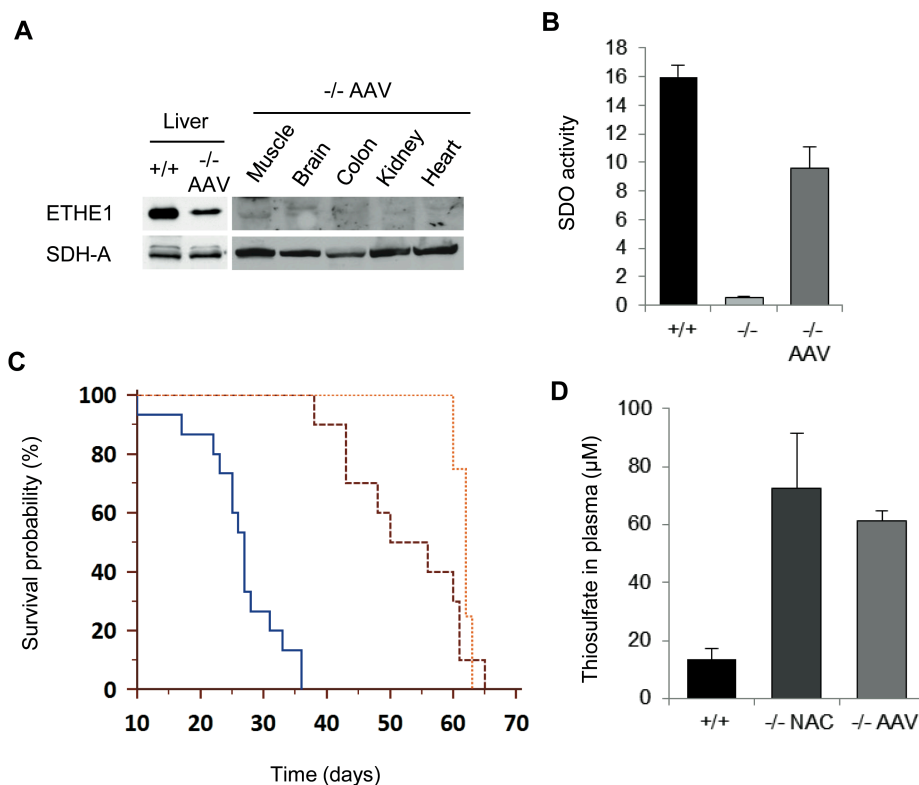

**Supplemental Figure 2.** Characterization of *Ethel1*<sup>-/-</sup> mice infected with 4x10<sup>12</sup> vg/Kg AAV2/8-TBG-*h.Ethel1*<sup>HA</sup>. **(A)** Liver-specific expression of the *h.Ethel1*<sup>HA</sup> gene product using an anti-Ethel1 antibody; SDH-A is used as a protein load standard. **(B)** SDO activity, expressed as nmol O<sub>2</sub>/min/mg) in *Ethel1*<sup>+/+</sup> (+/+), *Ethel1*<sup>-/-</sup> (-/-), and AAV-treated *Ethel1*<sup>-/-</sup> (-/- AAV) liver homogenates. **(C)** Kaplan-Meier survival probability curve. Significance was assessed by the log-rank test. Blue line: *Ethel1*<sup>-/-</sup> mice; Red line: NAC-treated *Ethel1*<sup>-/-</sup> mice; Yellow line: AAV+NAC-treated *Ethel1*<sup>-/-</sup> mice; the curves of NAC-treated and AAV+NAC-treated *Ethel1*<sup>-/-</sup> mice do not differ significantly; the difference with the untreated group is p<0.0001. **(D)** Plasma thiosulfate: the levels in AAV+NAC-treated *Ethel1*<sup>-/-</sup> (-/- AAV) mice do not significantly differ from those in NAC-only treated (-/- NAC) animals. The difference with the untreated group is p<0.0001 (unpaired, two-tail Student's *t* test). See main text for details.

### Supplemental Figure 3

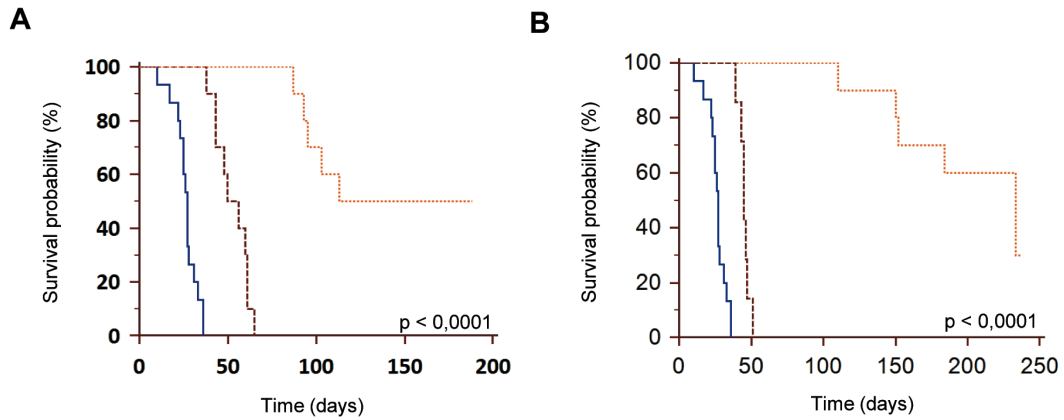

**Supplemental Figure 3.** Kaplan-Meier survival probability curves. **(A)** Blue line: untreated *Ethel*<sup>-/-</sup> mice (n=15); Red line: NAC-treated *Ethel*<sup>-/-</sup> mice (n=10); Yellow line: AAV+NAC-treated *Ethel*<sup>-/-</sup> mice (n=10). NAC was administered throughout the experiment. **(B)** Blue line: untreated *Ethel*<sup>-/-</sup> mice; Red line: NAC-treated *Ethel*<sup>-/-</sup> mice (n=7); Yellow line: AAV+NAC-treated *Ethel*<sup>-/-</sup> mice (n=10). NAC was suspended at P28. The two curves of NAC-treated *Ethel*<sup>-/-</sup> mice are not significantly different.

## Supplemental Figure 4

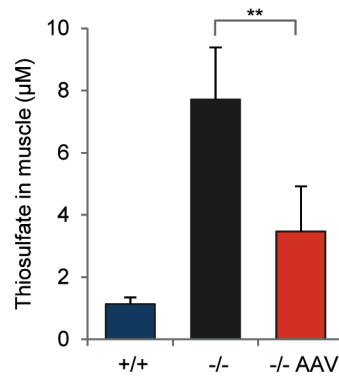

**Supplemental Figure 4.** Thiosulfate in skeletal muscle. Blue bar: *Ethe*<sup>+/+</sup> control mice (n=3); Black bar: untreated *Ethe1*<sup>-/-</sup> mice (n=3); Red bar: AAV-treated *Ethe1*<sup>-/-</sup> mice (n=5). \*\* Unpaired, two-tail Student's *t* test p= 0.0006.

**Supplemental Table I**

| Tissue | Genotype | COX/CS*    |
|--------|----------|------------|
| Muscle | +/+      | 99.7 ± 5.0 |
|        | -/-      | 22.7 ± 2.1 |
|        | -/- AAV  | 46.4 ± 6.0 |
| Brain  | +/+      | 60.7 ± 5.5 |
|        | -/-      | 16.7 ± 2.5 |
|        | -/- AAV  | 32.8 ± 4.7 |

Values are expressed as means ± SD. +/+ : *Ethe*<sup>+/+</sup> control mice (n=3); -/- : untreated *Ethe1*<sup>-/-</sup> mice (n=3); -/- AAV: AAV-treated *Ethe1*<sup>-/-</sup> mice (n=5)

\*Student's *t* test between each group in each tissue p<0.001
